# Supplementary material for: Incorporating Graphene Nanoplatelets and Carbon Nanotubes in Biobased Poly(ethylene 2,5-furandicarboxylate): Fillers’ Effect on the Matrix’s Structure and Lifetime
Source: MDPI journal article supplement (doi:10.3390/polym15020401), 2023-01-12
Supplement: s1 [file s1]

## Supplementary Materials

# Incorporating Graphene Nanoplatelets and Carbon Nanotubes in Biobased Poly(ethylene 2,5-furandicarboxylate): Fillers' Effect on the Matrix's Structure and Lifetime

Dimitra Kourtidou <sup>1</sup>, Dimitrios Karfaridis <sup>1</sup>, Thomas Kehagias <sup>1</sup>, George Vourlias <sup>1</sup>,  
Dimitrios N. Bikiaris <sup>2,\*</sup> and Konstantinos Chrissafis <sup>1,\*</sup>

<sup>1</sup> Laboratory of Advanced Materials and Devices, School of Physics, Aristotle University of Thessaloniki, Thessaloniki GR-541 24, Greece

<sup>2</sup> Laboratory of Polymer Chemistry and Technology, Department of Chemistry, Aristotle University of Thessaloniki; Thessaloniki GR-541 24, Greece

\* Correspondence: dbic@chem.auth.gr (D.N.B.); hrisafis@physics.auth.gr (K.C.)

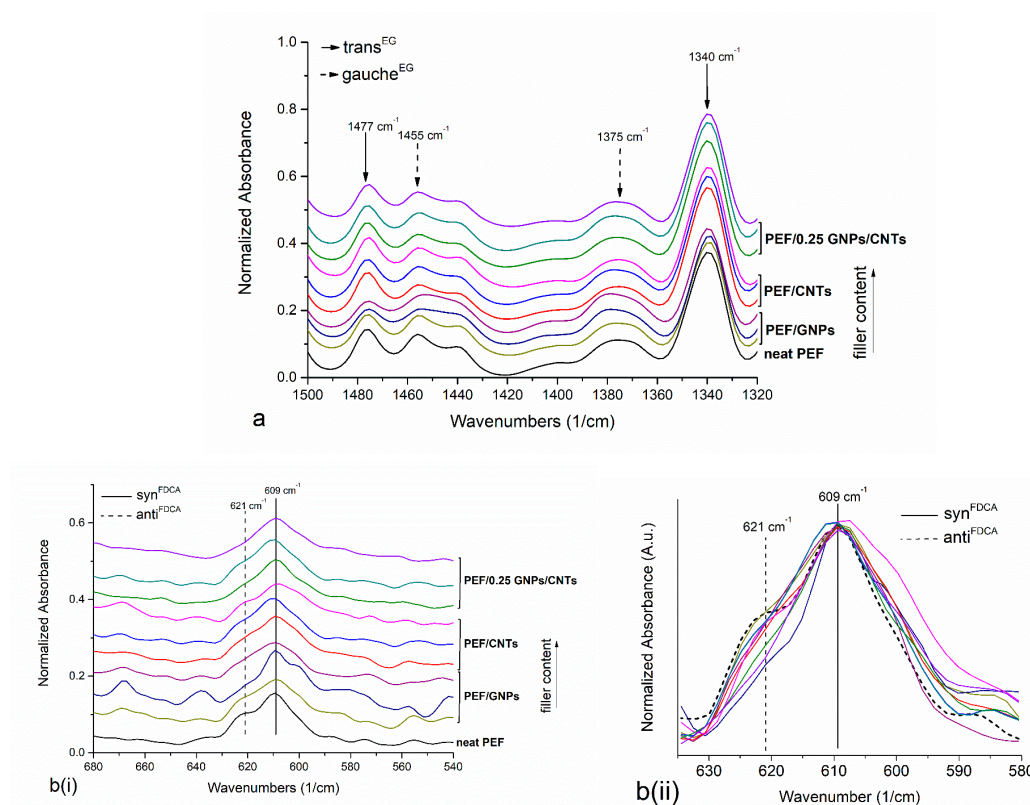

**Figure S1.** ATR spectra of all the prepared PEF materials (a) at the area of the EG absorbance bands and (b) the FDCA absorbance bands.

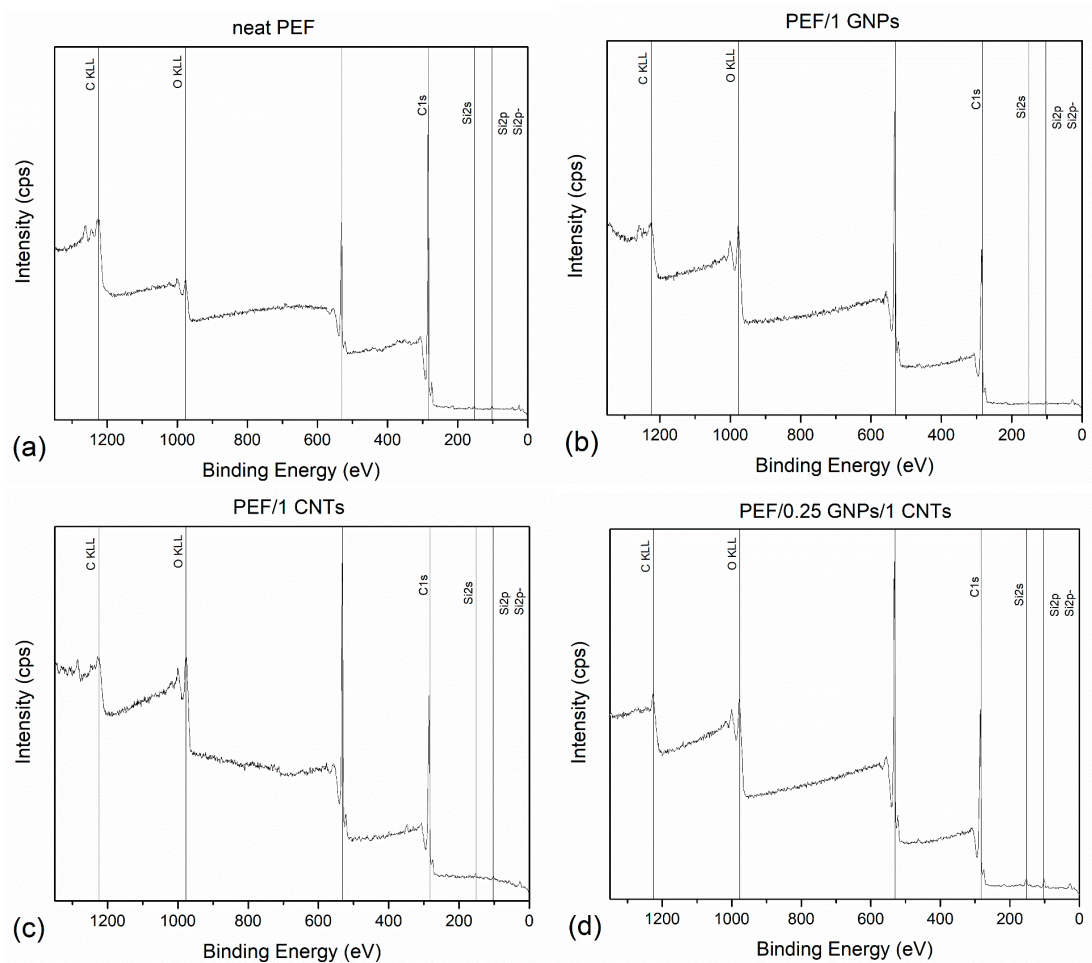

**Figure S2.** XPS wide scan spectra of (a) neat PEF, (b) PEF/ 1 GNPs, (c) PEF/1 CNTs, and (d) PEF/0.25 GNPs/1 CNTs.

**Table S1.** The atomic concentration of carbon and oxygen on the surface of neat PEF, PEF/ 1 GNPs, PEF/1 CNTs, and PEF/0.25 GNPs/1 CNTs

| Sample               | C atomic conc. (%) | O atomic conc. (%) |
|----------------------|--------------------|--------------------|
| PEF neat             | 85.4               | 14.6               |
| PEF/1 GNPs           | 66.1               | 33.9               |
| PEF/1 CNTs           | 64.7               | 35.2               |
| PEF/0.25 GNPs/1 CNTs | 72.3               | 27.7               |

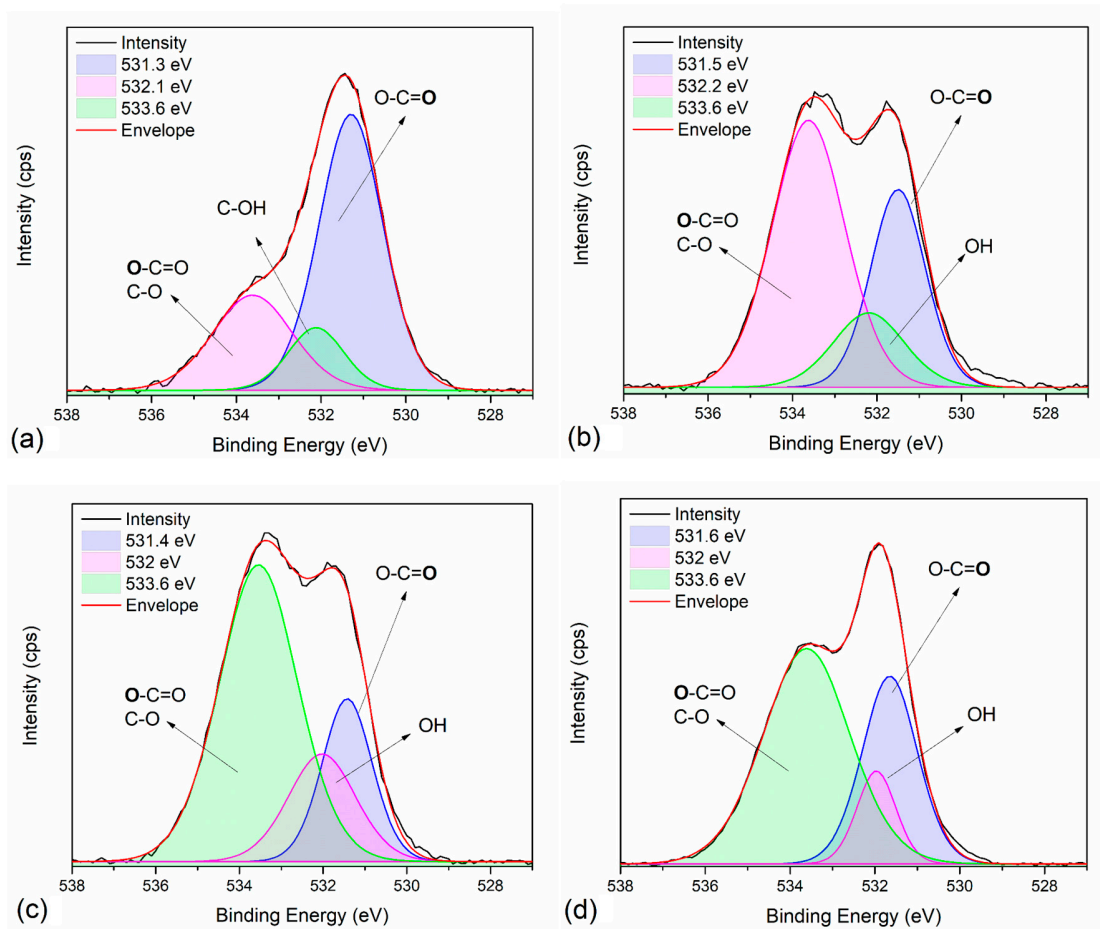

**Figure S3.** XPS spectra and peak deconvolution centered on the O1s orbital range of (a) neat PEF ( $R^2=0.999$ ), (b) PEF/ 1 GNPs ( $R^2=0.996$ ), (c) PEF/1 CNTs ( $R^2=0.997$ ), and (d) PEF/0.25 GNPs/1 CNTs ( $R^2=0.997$ ).
